# Supplementary material for: Free will beliefs are better predicted by dualism than determinism beliefs across different cultures
Source: PubMed Central journal article supplement (PMC6738589; doi:10.1371/journal.pone.0221617), 2019-09-11
Supplement: pone.0221617.s005.pdf [file pone.0221617.s005.pdf]

## **S5 Analysis: Effects of demographic variables on free will beliefs**

In order to assess the effect of demographic variables (age, sex, years of education) on FWI ratings, we estimated several linear models, separately predicting each of the three FWI sub-scales from age, sex, and years of education (using *lmBF* from the *BayesFactor* package). In the US, we found that none of these variables predicted FW-gen, FW-de, or FW-du (all  $BF_{10s} < 1.19$ ). The same was true in SGP (all  $BF_{10s} < 0.47$ ). Demographic variables thus have negligible effects on general free will, determinism, and dualism beliefs.
