# Supplementary material for: Free will beliefs are better predicted by dualism than determinism beliefs across different cultures
Source: PubMed Central journal article supplement (PMC6738589; doi:10.1371/journal.pone.0221617), 2019-09-11
Supplement: pone.0221617.s007.pdf [file pone.0221617.s007.pdf]

## **S7 Analysis: Relation of determinism and dualism**

Some have argued that determinism and dualism beliefs are unrelated (1), while others found them to be positively related (2). Here, we also estimated correlations in a Bayesian framework, reporting the correlation coefficient, the probability of it being above or below zero ( $p(r>0)$ ,  $p(r<0)$ ), and 95% credible intervals (95% CI), which indicates the range of values within which the correlation falls with a 95% probability. If this interval did not include 0, we interpreted the correlation as either positive or negative. Classically estimated (frequentist) correlation coefficients are also reported for the interested reader. We found FW-de and FW-du to be positively correlated in both the US,  $r = 0.21$ , 95%CI = [0.11, 0.30],  $p(r>0) > 0.99$ , (classical estimation:  $r = 0.17$ ,  $p < 0.001$ ), and SGP,  $r = 0.35$ , 95%CI = [0.26, 0.42],  $p(r>0) > 0.99$ , (classical estimation:  $r = 0.34$ ,  $p < 0.001$ ). Our results thus suggest a positive relation between determinism and dualism beliefs.

1. Nadelhoffer T, Shepard J, Nahmias E, Sripada C, Ross LT. The free will inventory: Measuring beliefs about agency and responsibility. *Conscious Cogn.* 2014 Apr;25:27–41.
2. Forstmann M, Burgmer P. A free will needs a free mind: Belief in substance dualism and reductive physicalism differentially predict belief in free will and determinism. *Conscious Cogn.* 2018 Aug 1;63:280–93.
